# Supplementary material
Source: publisher figshare collection journal article supplement (https://tandf.figshare.com/ndownloader/files/16751906)
Supplement: Supplementary file 1 [file 16751906]

Supplementary material

Comparison of CNC and CNF as additives in a waterborne acrylate-based anti-corrosion coating

[Authors and affiliations are not available here]

# Electrochemical impedance spectroscopy (EIS) fitted with equivalent circuit (2b)


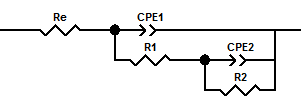
 **(2b)**

**
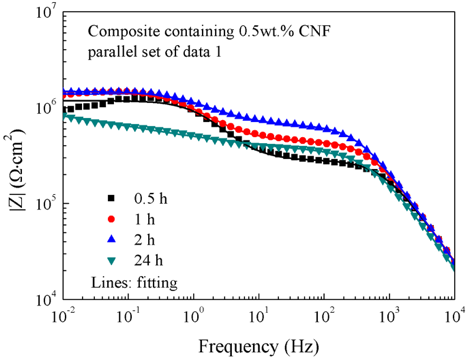

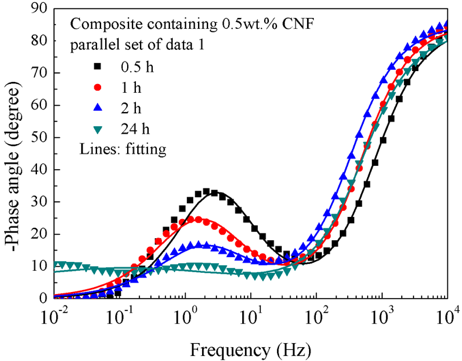
**Figure S1. Parallel data set 1. Bode plots of composite coating containing 0.5wt.% CNF measured in 0.1 M NaCl solution. Points represent measured data and lines represent spectra fitted with equivalent circuit 2b (covered by the points in the left panel).

Table S1. Parallel set of data 1. Fitting results of EIS spectra for composite coating containing 0.5 wt.% CNF fitted with equivalent circuit 2b.

| Time  (h) | Y01 (Ω1·cm-2·sn) | n1 | R1 (Ω·cm2) | Y02 (Ω-1·cm-2·sn) | n2 | R2 (Ω·cm2) | RP (Ω·cm2) |
| --- | --- | --- | --- | --- | --- | --- | --- |
| 0.5 | 1.2 x 10-9 | 0,95 | 2.8 x 105 | 0.2 x 10-6 | 0.90 | 0.9 x 106 | 1.5 x 106 |
| 1 | 1.1 x 10-9 | 0,95 | 4.5 x 105 | 0.3 x 10-6 | 0.81 | 1.0 x 106 | 1.9 x 106 |
| 2 | 1.1 x 10-9 | 0,95 | 6.5 x 105 | 0.3 x 10-6 | 0.77 | 0.8 x 106 | 2.1 x 106 |
| 24 | 1.6 x 10-9 | 0,93 | 3.2 x 105 | 2.4 x 10-6 | 0.32 | 0.9 x 106 | 1.6 x 106 |

**
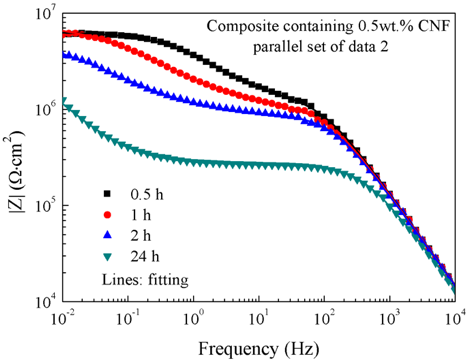

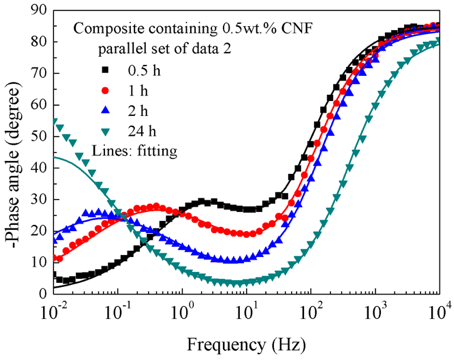
**Figure S2. Parallel data set 2. Bode plots of composite coating containing 0.5wt.% CNF measured in 0.1 M NaCl solution. Points represent measured data and lines represent spectra fitted with equivalent circuit 2b (covered by the points in the left panel).

Table S2. Parallel set of data 2. Fitting and/or simulation results of EIS spectra for composite coating containing 0.5 wt.% CNF fitted with circuit 2b.

| Time  (h) | Y01 (Ω1·cm-2·sn) | n1 | R1 (Ω·cm2) | Y02 (Ω-1·cm-2·sn) | | n2 | R2 (Ω·cm2) | RP (106·Ω·cm2) |
| --- | --- | --- | --- | --- | --- | --- | --- | --- |
| 0.5 | 1.8 x 10-9 | 0.95 | 1.3 x 106 | 0.07 x 10-6 | 0.70 | | 5.1 x 106 | 6.4 x 106 |
| 1 | 2.0 x 106 | 0.94 | 1.0 x 106 | 0.25 x 106 | 0.58 | | 6.9 x 106 | 7.9 x 106 |
| 2 | 2.1 x 106 | 0.94 | 0.8 x 106 | 0.84 x 106 | 0.55 | | 5.3 x 106 | 6.1 x 106 |
| 24 | 3.0 x 106 | 0.91 | 0.3 x 106 | 6.6 x 106 | 0.71 | | ~5.2 x 106 | 5.5 x 106 |

Note: Symbol of ~ indicates that during fitting process this parameter was fixed.

# Electrochemical impedance spectroscopy (EIS) fitted with equivalent circuit 2c.


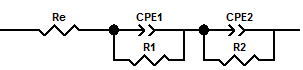
 **(2c)**


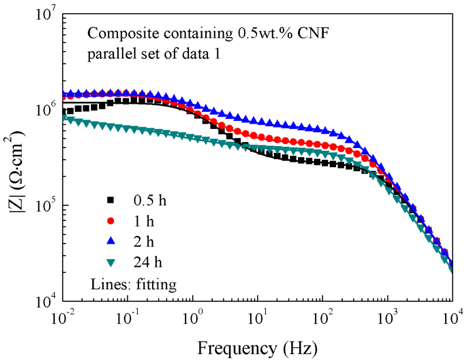

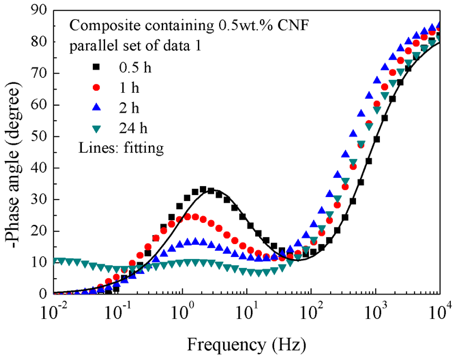
Figure S3. Parallel data set 1. Bode plots of composite coating containing 0.5wt.% CNF measured in 0.1 M NaCl solution. Points represent measured data and lines represent spectra fitted with circuit 2c (covered by the points in the left panel).

Table S3. Parallel set of data 1. Fitting results of EIS spectra for composite coating containing 0.5 wt.% CNF fitted with circuit 2c.

| Time  (h) | Y01 (Ω1·cm-2·sn) | n1 | R1 (Ω·cm2) | Y02 (Ω-1·cm-2·sn) | n2 | R2 (Ω·cm2) | RP (Ω·cm2) |
| --- | --- | --- | --- | --- | --- | --- | --- |
| 0.5 | 1.2 x 10-9 | 0.94 | 2.8 x 105 | 0.16 x 10-6 | 0.90 | 0.91 x 106 | 1.2 x 106 |
| 1 | 1.1 x 10-9 | 0.95 | 4.4 x 105 | 0.25 x 10-6 | 0.81 | 1.0 x 106 | 1.5 x 106 |
| 2 | 1.2 x 10-9 | 0.95 | 6.4 x 105 | 0.25 x 10-6 | 0.77 | 0.84 x 106 | 1.5 x 106 |
| 24 | 1.8 x 10-9 | 0.93 | 3.5 x 105 | 2.0 x 10-6 | 0.47 | 0.55 x 106 | 0.9 x 106 |


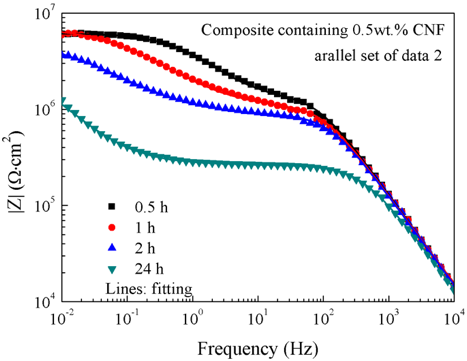

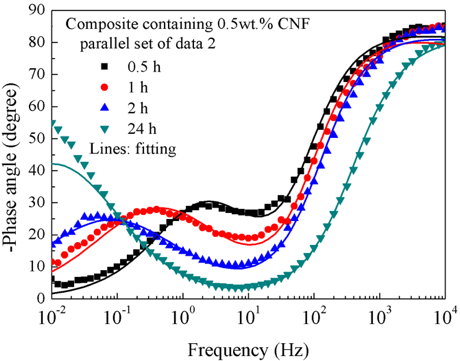
Figure S4. Parallel data set 2. Bode plots of composite coating containing 0.5wt.% CNF measured in 0.1 M NaCl solution. Points represent measured data and lines represent spectra fitted and/or simulated with circuit 2c (covered by the points in the left panel).

Table S4. Parallel set of data 2. Fitting and/or simulation results of EIS spectra for composite coating containing 0.5 wt.% CNF fitted with circuit 2c.

| Time  (h) | Y01 (Ω1·cm-2·sn) | n1 | R1 (Ω·cm2) | Y02 (Ω-1·cm-2·sn) | n2 | R2 (Ω·cm2) | RP (Ω·cm2) |
| --- | --- | --- | --- | --- | --- | --- | --- |
| 0.5 | 1.9 x 10-9 | 0.97 | 1.2 x 106 | 0.06 x 10-6 | 0.75 | 5.0 x 106 | 6.2 x 106 |
| 1 | 2.0 x 10-9 | 0.96 | 1.0 x 106 | 0.23 x 10-6 | 0.64 | 6.1 x 106 | 7.1 x 106 |
| 2 | 2.1 x 10-9 | 0.95 | 0.85 x 106 | 0.83 x 10-6 | 0.60 | 4.6 x 106 | 5.4 x 106 |
| 24 | 3.0 x 10-9 | 0.91 | 0.26 x 106 | 6.6 x 10-6 | 0.71 | ~4.5 x 106 | 4.7 x 106 |

**Note:** Symbol of ~ indicates that during fitting process this parameter was fixed.


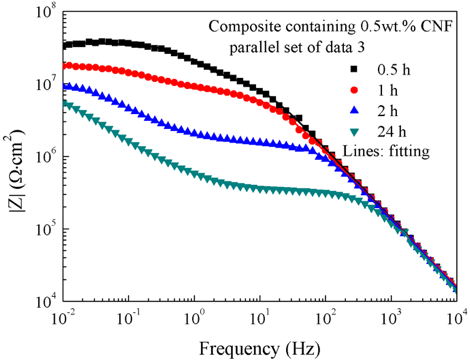

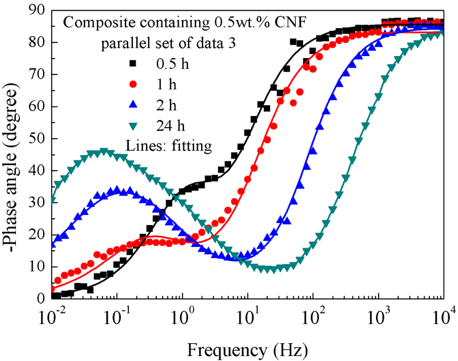
Figure S5. Parallel data set 3. Bode plots of composite coating containing 0.5wt.% CNF measured in 0.1 M NaCl solution. Points represent measured data and lines represent spectra fitted with circuit 2c (covered by the points in the left panel).

Table S5. Parallel set of data 3. Fitting results of EIS spectra for composite coating containing 0.5 wt.% CNF fitted with circuit 2c.

| Time  (h) | Y01 (Ω1·cm-2·sn) | n1 | R1 (Ω·cm2) | Y02 (Ω-1·cm-2·sn) | n2 | R2 (Ω·cm2) | RP (Ω·cm2) |
| --- | --- | --- | --- | --- | --- | --- | --- |
| 0.5 | 1.9 x 10-9 | 0.97 | 8.97 x 106 | 0.12 x 10-7 | 0.90 | 2.8 x 107 | 3.6 x 107 |
| 1 | 2.1 x 10-9 | 0.95 | 7.03 x 106 | 0.86 x 10-7 | 0.79 | 1.1 x 107 | 1.8 x 107 |
| 2 | 1.6 x 10-9 | 0.97 | 1.43 x 106 | 3.2 x 10-7 | 0.70 | 1.1 x 107 | 1.2 x 107 |
| 24 | 1.7 x 10-9 | 0.97 | 0.32 x 106 | 8.7 x 10-7 | 0.67 | 1.1 x 107 | 1.2 x 107 |

# The other sets of parallel data of EIS for the matrix coating and the composite coating containing CNC have been published elsewhere15.


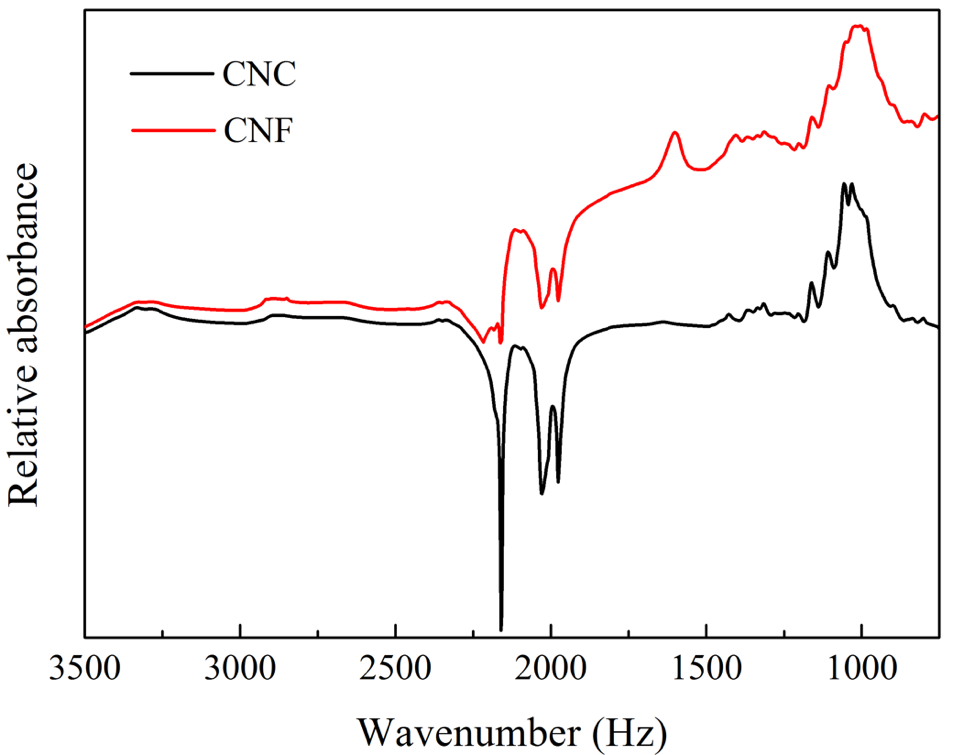


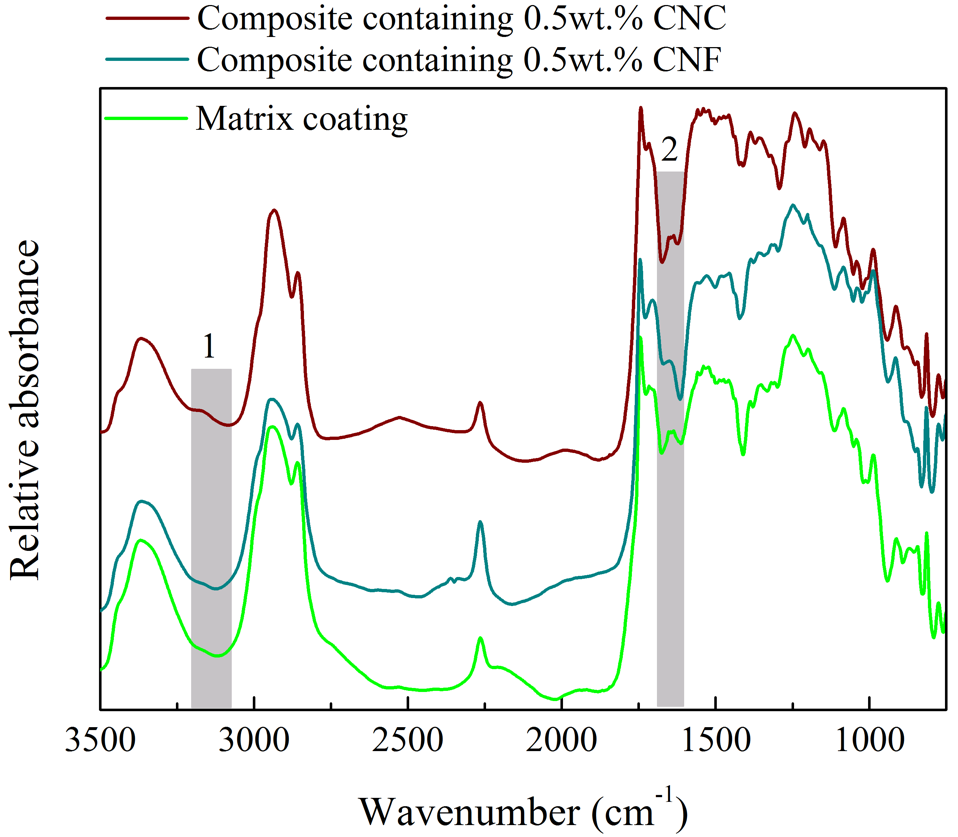


Figure S6. Full frequency range FTIR spectra of CNC (black) and CNF (red), matrix coating (green), CNF reinforced composite coating (dark cyan) and CNC reinforced composite coating (brown). The bands observed between 2700 cm-1 – 1900 cm-1 is mainly due to interference effects in FTIR instrument.
